# Supplementary material
Source: MDPI journal article supplement (https://www.mdpi.com/2311-5637/8/4/149)
Supplement: s1 [file s1]

**Table S1.** The region and vineyards of strains used

| <b>Region</b>        | <b>Vineyards</b>         | <b>Strain</b>                    | <b>Strain code</b> |
|----------------------|--------------------------|----------------------------------|--------------------|
| Yunnan               | Adon village             | <i>Rhodotorula nothofagi</i>     | B1                 |
|                      |                          | <i>Aureobasidium pullulans</i>   | B2                 |
|                      |                          | <i>Hanseniaspora uvarum</i>      | B15                |
|                      |                          | <i>Hanseniaspora uvarum</i>      | B17                |
|                      |                          | <i>Meyerozyma guilliermondii</i> | B21                |
|                      |                          | <i>Hanseniaspora uvarum</i>      | B22                |
|                      |                          | <i>Hanseniaspora uvarum</i>      | B39                |
|                      | Lezhong village          | <i>Hanseniaspora uvarum</i>      | B12                |
|                      | Shuori village           | <i>Aureobasidium pullulans</i>   | B5                 |
|                      |                          | <i>Starmerella bacillaris</i>    | B44                |
|                      |                          | <i>Starmerella bacillaris</i>    | B45                |
|                      | Sile village             | <i>Hanseniaspora uvarum</i>      | B35                |
|                      |                          | <i>Hanseniaspora uvarum</i>      | B37                |
|                      | Sinong village           | <i>Hanseniaspora uvarum</i>      | B8                 |
|                      |                          | <i>Hanseniaspora uvarum</i>      | B9                 |
|                      |                          | <i>Hanseniaspora uvarum</i>      | B10                |
|                      |                          | <i>Hanseniaspora uvarum</i>      | B32                |
|                      |                          | <i>Hanseniaspora uvarum</i>      | B33                |
|                      |                          | <i>Hanseniaspora uvarum</i>      | B34                |
|                      |                          | <i>Hanseniaspora uvarum</i>      | B48                |
| Ningxia              | Chateau Gem              | <i>Hanseniaspora uvarum</i>      | D3                 |
|                      |                          | <i>Hanseniaspora uvarum</i>      | D15                |
|                      |                          | <i>Candida glabrata</i>          | D16                |
|                      |                          | <i>Candida glabrata</i>          | D18                |
|                      | Kaifu Winery             | <i>Hanseniaspora uvarum</i>      | D36                |
|                      | Yunkou Wine Estate       | <i>Candida xestobii</i>          | D1                 |
|                      |                          | <i>Hanseniaspora uvarum</i>      | D2                 |
|                      |                          | <i>Wickerhamomyces anomalus</i>  | D6                 |
|                      |                          | <i>Hanseniaspora uvarum</i>      | D25                |
|                      |                          | <i>Hanseniaspora uvarum</i>      | D26                |
|                      |                          | <i>Candida glabrata</i>          | D40                |
|                      |                          | <i>Hanseniaspora uvarum</i>      | D44                |
|                      | Chateau Zhihuiyuanshi    | <i>Hanseniaspora uvarum</i>      | D8                 |
|                      |                          | <i>Hanseniaspora uvarum</i>      | D23                |
|                      |                          | <i>Starmerella bacillaris</i>    | D31                |
|                      |                          | <i>Starmerella bacillaris</i>    | D32                |
| Fangshan,<br>Beijing | Chateau Longxibao        | <i>Hanseniaspora uvarum</i>      | F8                 |
|                      |                          | <i>Hanseniaspora uvarum</i>      | F10                |
|                      |                          | <i>Hanseniaspora opuntiae</i>    | F17                |
|                      | Chateau Redengbao        | <i>Hanseniaspora uvarum</i>      | F12                |
| Gansu                | 38 degree winery         | <i>Meyerozyma caribbica</i>      | F26                |
|                      |                          | <i>Hanseniaspora uvarum</i>      | G2                 |
|                      | Sanhe village, Suwu town | <i>Hanseniaspora uvarum</i>      | G6                 |
|                      |                          | <i>Hanseniaspora uvarum</i>      | G1                 |
|                      |                          | <i>Hanseniaspora uvarum</i>      | G5                 |
| Huailai,<br>Hebei    | Baihua Valley            | <i>Hanseniaspora uvarum</i>      | E27                |
|                      | Nobility Chateau         | <i>Hanseniaspora uvarum</i>      | E7                 |
|                      | Chateau Red Leaf         | <i>Hanseniaspora uvarum</i>      | E29                |

|                   |                                         |                                  |     |
|-------------------|-----------------------------------------|----------------------------------|-----|
| Changli,<br>Hebei | Amethyst Manor<br>Bodega Langes         | <i>Meyerozyma guilliermondii</i> | E31 |
|                   |                                         | <i>Hanseniaspora uvarum</i>      | E20 |
|                   |                                         | <i>Starmerella bacillaris</i>    | I17 |
|                   |                                         | <i>Hanseniaspora uvarum</i>      | I19 |
|                   |                                         | <i>Hanseniaspora uvarum</i>      | I23 |
|                   |                                         | <i>Hanseniaspora vineae</i>      | I40 |
|                   |                                         | <i>Starmerella bacillaris</i>    | I46 |
|                   |                                         | <i>Hanseniaspora opuntiae</i>    | I55 |
|                   |                                         | <i>Hanseniaspora uvarum</i>      | I57 |
|                   |                                         | <i>Starmerella bacillaris</i>    | I59 |
|                   | Great Wall Base 1 (flat)                | <i>Hanseniaspora uvarum</i>      | I60 |
|                   |                                         | <i>Starmerella bacillaris</i>    | I71 |
|                   |                                         | <i>Hanseniaspora vineae</i>      | I1  |
|                   |                                         | <i>Hanseniaspora uvarum</i>      | I2  |
|                   |                                         | <i>Starmerella bacillaris</i>    | I8  |
|                   |                                         | <i>Hanseniaspora uvarum</i>      | I9  |
|                   |                                         | <i>Starmerella bacillaris</i>    | I13 |
|                   |                                         | <i>Hanseniaspora uvarum</i>      | I33 |
|                   |                                         | <i>Starmerella bacillaris</i>    | I36 |
|                   | Yantai                                  | <i>Hanseniaspora uvarum</i>      | H4  |
|                   |                                         | <i>Issatchenkia terricola</i>    | H5  |
|                   |                                         | <i>Hanseniaspora uvarum</i>      | H6  |
|                   |                                         | <i>Hanseniaspora uvarum</i>      | H7  |
|                   | Chateau Longhu                          | <i>Hanseniaspora uvarum</i>      | H1  |
|                   |                                         | <i>Hanseniaspora uvarum</i>      | H2  |
|                   |                                         | <i>Hanseniaspora uvarum</i>      | H15 |
|                   |                                         | <i>Hanseniaspora opuntiae</i>    | H31 |
|                   |                                         | <i>Hanseniaspora uvarum</i>      | H37 |
|                   | Chateau Reifeng Auzias<br>Base Tonglili | <i>Hanseniaspora uvarum</i>      | H30 |
|                   |                                         | <i>Hanseniaspora opuntiae</i>    | H16 |
|                   |                                         | <i>Starmerella bacillaris</i>    | H18 |
|                   | COFCO Greatwall                         | <i>Kazachstania hellenica</i>    | H67 |
|                   |                                         | <i>Hanseniaspora uvarum</i>      | H10 |
|                   |                                         | <i>Issatchenkia terricola</i>    | H20 |
|                   |                                         | <i>Starmerella bacillaris</i>    | H23 |
|                   |                                         | <i>Hanseniaspora uvarum</i>      | H25 |
|                   |                                         | <i>Hanseniaspora uvarum</i>      | H35 |

---

**Table S2.** The average peak area and relative peak area of volatile aroma compounds in each sample

| Aroma compounds                 | Grape juice        |          | S1              |          | H5              |          | DES7            |          | UV5             |          | UV8             |          |
|---------------------------------|--------------------|----------|-----------------|----------|-----------------|----------|-----------------|----------|-----------------|----------|-----------------|----------|
|                                 | AVE Peak<br>(×106) | RPA<br>% | AVE Peak (×106) | RPA<br>% |
| <b>Alcohol (Except ethanol)</b> |                    |          |                 |          |                 |          |                 |          |                 |          |                 |          |
| 2-Methyl-1-propanol             | N.D.               | N.D.     | N.D.            | N.D.     | 2.73±0.13b      | 0.54     | 2.55±0.14b      | 0.62     | N.D.            | N.D.     | 0.59±0.01a      | 0.06     |
| 3-Methyl-1-butanol              | N.D.               | N.D.     | 43.57±1.62b     | 1.70     | 49.53±10.76b    | 9.87     | 50.29±5.64b     | 12.30    | 21.38±0.85a     | 1.05     | 24.8±2.22a      | 2.43     |
| Hexyl alcohol                   | 31.5±6.77c         | 14.53    | 2.02±0.01a      | 0.08     | 8.89±0.82b      | 1.77     | 8.86±0.61b      | 2.17     | 6.27±0.57ab     | 0.31     | 2.56±0.13ab     | 0.25     |
| Leaf alcohol                    | 3.65±1.31b         | 1.69     | N.D.            | N.D.     | 0.72±0.32a      | 0.14     | 0.56±0.01a      | 0.14     | N.D.            | N.D.     | N.D.            | N.D.     |
| (E)-2-Hexen-1-ol                | 45.91±9.9b         | 21.18    | N.D.            | N.D.     | N.D.            | N.D.     | N.D.            | N.D.     | 1.11±0.53a      | 0.05     | N.D.            | N.D.     |
| 2-Ethylhexanol                  | 0.6±0.19a          | 0.28     | N.D.            | N.D.     |
| 1-Octanol                       | 0.23±0.04a         | 0.11     | 0.31±0.01b      | 0.01     | N.D.            | N.D.     | N.D.            | N.D.     | 0.4±0.02c       | 0.02     | N.D.            | N.D.     |
| Terpineol                       | 2.28±0.02b         | 1.05     | N.D.            | N.D.     | 1.02±0.16a      | 0.20     | 0.88±0.03a      | 0.21     | N.D.            | N.D.     | N.D.            | N.D.     |
| 1,2-Butylene glycol             | N.D.               | N.D.     | N.D.            | N.D.     | N.D.            | N.D.     | 0.37±0.02a      | 0.09     | N.D.            | N.D.     | N.D.            | N.D.     |
| Geraniol                        | N.D.               | N.D.     | N.D.            | N.D.     | N.D.            | N.D.     | N.D.            | N.D.     | N.D.            | N.D.     | 0.25±0.02a      | 0.02     |
| Decyl alcohol                   | N.D.               | N.D.     | 1.04±0.12b      | 0.04     | 0.11±0.02a      | 0.02     | N.D.            | N.D.     | 2.83±0.39c      | 0.14     | 0.08±0.01a      | 0.01     |
| Citronellol                     | N.D.               | N.D.     | N.D.            | N.D.     | 0.52±0.06b      | 0.10     | 0.46±0.01b      | 0.11     | N.D.            | N.D.     | 0.17±0.03a      | 0.02     |
| 1,2-Octanediol                  | N.D.               | N.D.     | N.D.            | N.D.     | N.D.            | N.D.     | N.D.            | N.D.     | N.D.            | N.D.     | 0.81±0.2a       | 0.08     |
| Benzyl alcohol                  | 2±0.21bc           | 0.92     | N.D.            | N.D.     | 1.54±0.68bc     | 0.31     | 0.68±0.13ab     | 0.7      | 0.98±0.22ab     | 0.05     | 0.14±0.02a      | 0.01     |
| Phenethyl alcohol               | 0.45±0.13a         | 0.21     | 38±3.77c        | 1.48     | 95.3±5.44d      | 18.98    | 101.93±1.37e    | 24.93    | 21.23±0.75b     | 1.05     | 21.39±2.37b     | 2.09     |
| 1-Dodecanol                     | N.D.               | N.D.     | 2.31±0.46b      | 0.09     | 0.43±0.18a      | 0.09     | 0.24±0.01a      | 0.06     | 5.13±1.14c      | 0.25     | 0.14±0.03a      | 0.01     |
| Nerolidol                       | N.D.               | N.D.     | 1.28±0.22d      | 0.05     | 0.95±0.07bc     | 0.19     | 0.82±0.11b      | 0.20     | 1.21±0.1cd      | 0.06     | 0.09±0.05a      | 0.01     |
| 1-Tetradecanol                  | N.D.               | N.D.     | N.D.            | N.D.     | 0.4±0.22a       | 0.08     | 0.28±0.01a      | 0.07     | 2.16±0.21b      | 0.11     | 0.09±0.04a      | 0.01     |
| 3,5-Dimethylbenzyl alcohol      | N.D.               | N.D.     | 0.42±0.03b      | 0.02     | 0.87±0.09c      | 0.17     | 0.82±0.07c      | 0.20     | 0.46±0.01b      | 0.02     | 0.17±0.03a      | 0.02     |
| 1-Pentanol                      |                    | N.D.     | N.D.            | N.D.     | N.D.            | N.D.     | N.D.            | N.D.     | 12.13±1.93a     | 0.60     | N.D.            | N.D.     |
| 1,2-Heptanediol                 |                    | N.D.     | 1.1±0.04a       | 0.04     | 0.34±0.13a      | 0.07     | N.D.            | N.D.     | N.D.            | N.D.     | N.D.            | N.D.     |
| In total                        | 86.63              | 39.97    | 90.04           | 3.51     | 163.34          | 32.54    | 168.75          | 41.28    | 75.28           | 3.71     | 51.27           | 5.02     |
| <b>Acid</b>                     |                    |          |                 |          |                 |          |                 |          |                 |          |                 |          |
| Propionic acid                  | N.D.               | N.D.     | N.D.            | N.D.     | 0.46±0.08a      | 0.09     | 0.4±0.06a       | 0.10     | N.D.            | N.D.     | N.D.            | N.D.     |

[illegible]

|                              |             |       |               |       |              |       |              |       |               |       |              |       |
|------------------------------|-------------|-------|---------------|-------|--------------|-------|--------------|-------|---------------|-------|--------------|-------|
| Decanyl acetate              | N.D.        | N.D.  | N.D.          | N.D.  | N.D.         | N.D.  | N.D.         | N.D.  | 1.91±0.47a    | 0.09  | N.D.         | N.D.  |
| Ethyl 9-decenoate            | N.D.        | N.D.  | 515.38±19.23c | 20.08 | 22.66±10.69a | 4.51  | 1.93±0.67a   | 0.47  | 254.04±32.04b | 12.51 | 0.63±0.29a   | 0.06  |
| Dimethyl glutarate           | 0.31±0.08a  | 0.14  | N.D.          | N.D.  | N.D.         | N.D.  | N.D.         | N.D.  | N.D.          | N.D.  | N.D.         | N.D.  |
| Ethyl cis-4-decenoate        | N.D.        | N.D.  | 1.96±0.32a    | 0.08  | N.D.         | N.D.  | N.D.         | N.D.  | 2.13±0.36a    | 0.11  | N.D.         | N.D.  |
| Propylcaprate                | N.D.        | N.D.  | 1.03±0.04a    | 0.04  | N.D.         | N.D.  | N.D.         | N.D.  | 0.6±0.15a     | 0.03  | N.D.         | N.D.  |
| Benzyl acetate               | N.D.        | N.D.  | N.D.          | N.D.  | N.D.         | N.D.  | N.D.         | N.D.  | N.D.          | N.D.  | 0.18±0.03a   | 0.02  |
| Isobutyl caprate             | N.D.        | N.D.  | 2.32±0.76b    | 0.09  | 1.17±0.13a   | 0.23  | 0.8±0.15a    | 0.19  | 0.56±0.14a    | 0.03  | N.D.         | N.D.  |
| Methyl salicylate            | N.D.        | N.D.  | N.D.          | N.D.  | 0.12±0.01b   | 0.02  | 0.12±0.01b   | 0.03  | N.D.          | N.D.  | 0.04±0.01a   | 0.00  |
| Ethyl phenylacetate          | N.D.        | N.D.  | N.D.          | N.D.  | N.D.         | N.D.  | N.D.         | N.D.  | N.D.          | N.D.  | 0.27±0.03a   | 0.03  |
| Phenethyl acetate            | N.D.        | N.D.  | 12.01±2.31a   | 0.47  | 2.93±0.25a   | 0.58  | 2.29±0.29a   | 0.56  | 3.96±0.17a    | 0.20  | 69.75±12.02b | 6.83  |
| Ethyl laurate                | N.D.        | N.D.  | 306.46±9.4d   | 11.94 | 30.67±6.42b  | 6.11  | 16.06±1.77ab | 3.93  | 274.42±6.18c  | 13.52 | 11.16±4.32a  | 1.09  |
| Isoamyl Octanoate            | N.D.        | N.D.  | 19.97±5.44b   | 0.78  | 2.39±0.11a   | 0.48  | 1.89±0.01a   | 0.46  | N.D.          | N.D.  | 0.36±0.08a   | 0.04  |
| Isoamyl decanoate            | N.D.        | N.D.  | N.D.          | N.D.  | N.D.         | N.D.  | N.D.         | N.D.  | 5.74±0.27a    | 0.28  | N.D.         | N.D.  |
| Butyl decanoate              | N.D.        | N.D.  | 0.35±0.1a     | 0.01  | N.D.         | N.D.  | N.D.         | N.D.  | N.D.          | N.D.  | N.D.         | N.D.  |
| Ethyl tetradecanoate         | N.D.        | N.D.  | 7.12±0.75b    | 0.28  | 2.66±0.22a   | 0.53  | 2.01±0.23a   | 0.49  | 14.21±2.84c   | 0.70  | 1.35±0.22a   | 0.13  |
| Ethyl undecanoate            | N.D.        | N.D.  | 11.99±2.22b   | 0.47  | 1.19±0.53a   | 0.24  | 0.12±0.05a   | 0.03  | 17.99±0.69c   | 0.89  | 0.11±0.07a   | 0.01  |
| Ethyl Pentadecanoate         | N.D.        | N.D.  | 0.58±0.08a    | 0.02  | 0.38±0.11a   | 0.08  | 0.36±0.07a   | 0.09  | N.D.          | N.D.  | N.D.         | N.D.  |
| Ethyl palmitate              | N.D.        | N.D.  | 62.1±11.55c   | 2.42  | 11.1±2.93a   | 2.21  | 12.34±3.02a  | 3.02  | 35.23±8.48b   | 1.74  | 5.32±1.01a   | 0.52  |
| Ethyl 9-Hexadecenoate        | N.D.        | N.D.  | 126.66±16.41b | 4.93  | 14.52±2.27a  | 2.89  | 7.57±1.65a   | 1.85  | 136.62±25.14b | 6.73  | 1.53±0.33a   | 0.15  |
| Ethyl stearate               | N.D.        | N.D.  | 4.37±0.93b    | 0.17  | 0.14±0a      | 0.03  | 0.18±0.07a   | 0.04  | 0.44±0.19a    | 0.02  | 0.1±0.03a    | 0.01  |
| Ethyl linoleate              | N.D.        | N.D.  | 2.1±0.69a     | 0.08  | 1.17±0.03a   | 0.23  | 1.06±0.03a   | 0.26  | N.D.          | N.D.  | N.D.         | N.D.  |
| Ethyl oleate                 | N.D.        | N.D.  | 11.99±1.31b   | 0.47  | 3.28±1.45a   | 0.65  | 3.67±1.47a   | 0.90  | 3.74±1.38a    | 0.18  | 0.93±0.32a   | 0.09  |
| 2-Phenylethyl octanoate      | N.D.        | N.D.  | 0.42±0.11a    | 0.02  | N.D.         | N.D.  | N.D.         | N.D.  | N.D.          | N.D.  | N.D.         | N.D.  |
| Butyl cyclohexyl phthalate   | N.D.        | N.D.  | N.D.          | N.D.  | N.D.         | N.D.  | N.D.         | N.D.  | 0.21±0.01a    | 0.01  | N.D.         | N.D.  |
| In total                     | 0.31        | 0.14  | 2357.37       | 91.85 | 294.87       | 58.74 | 202.57       | 49.56 | 1790.31       | 88.19 | 938.43       | 91.85 |
| <b>Aldehydes and ketones</b> |             |       |               |       |              |       |              |       |               |       |              |       |
| Hexanal                      | 32.4±13.82a | 14.95 | N.D.          | N.D.  | N.D.         | N.D.  | N.D.         | N.D.  | N.D.          | N.D.  | N.D.         | N.D.  |
| 2-Hexenal                    | 30.39±7.65a | 14.02 | N.D.          | N.D.  | N.D.         | N.D.  | N.D.         | N.D.  | N.D.          | N.D.  | N.D.         | N.D.  |
| Benzaldehyde                 | 1.08±0.25cd | 0.50  | 0.2±0.04a     | 0.01  | 1.14±0.03d   | 0.23  | 0.77±0.18b   | 0.19  | 0.81±0.08bc   | 0.04  | 0.52±0.05b   | 0.05  |

|                             |             |       |            |      |             |      |             |      |              |      |            |      |
|-----------------------------|-------------|-------|------------|------|-------------|------|-------------|------|--------------|------|------------|------|
| Phenylacetaldehyde          | 0.57±0.06b  | 0.26  | N.D.       | N.D. | N.D.        | N.D. | 0.3±0.01a   | 0.07 | N.D.         | N.D. | N.D.       | N.D. |
| Dimethylbenzaldehyde        | 15.97±1.25c | 7.42  | 7.58±0.36b | 0.30 | N.D.        | N.D. | 2.27±0.26a  | 0.56 | 20.31±0.82d  | 1.00 | 8.45±1.12b | 0.83 |
| beta-Damascenone            | 14.33±0.76b | 6.61  | N.D.       | N.D. | 4.22±1.22a  | 0.84 | 3.99±1.54a  | 0.98 | N.D.         | N.D. | N.D.       | N.D. |
| Tetradecanal                | N.D.        | N.D.  | N.D.       | N.D. | N.D.        | N.D. | N.D.        | N.D. | 0.76±0.02a   | 0.04 | N.D.       | N.D. |
| 2-Dodecanone                | N.D.        | N.D.  | 0.17±0.02a | 0.01 | N.D.        | N.D. | N.D.        | N.D. | N.D.         | N.D. | N.D.       | N.D. |
| Hexadecanal                 | N.D.        | N.D.  | N.D.       | N.D. | N.D.        | N.D. | N.D.        | N.D. | 1.11±0.23a   | 0.05 | N.D.       | N.D. |
| 2-Hydroxycyclopentadecanone | N.D.        | N.D.  | N.D.       | N.D. | N.D.        | N.D. | 0.37±0.13a  | 0.09 | N.D.         | N.D. | N.D.       | N.D. |
| In total                    | 94.87       | 43.78 | 7.96       | 0.31 | 5.36        | 1.07 | 7.70        | 1.88 | 23.00        | 1.13 | 8.97       | 0.88 |
| <b>Terpenes</b>             |             |       |            |      |             |      |             |      |              |      |            |      |
| 2,4-Hexadiene               | 1.03±0a     | 0.47  | N.D.       | N.D. | N.D.        | N.D. | N.D.        | N.D. | N.D.         | N.D. | N.D.       | N.D. |
| 1-Decene                    | N.D.        | N.D.  | 0.99±0.07a | 0.04 | N.D.        | N.D. | N.D.        | N.D. | N.D.         | N.D. | N.D.       | N.D. |
| 4,5-Dimethyl-1-hexene       | N.D.        | N.D.  | 9.07±2.77a | 0.35 | N.D.        | N.D. | N.D.        | N.D. | 2.76±0.18a   | 0.14 | N.D.       | N.D. |
| 1-Pentadecene               | N.D.        | N.D.  | N.D.       | N.D. | 0.1±0.02a   | 0.02 | N.D.        | N.D. | N.D.         | N.D. | N.D.       | N.D. |
| In total                    | 1.03        | 0.47  | 10.06      | 0.39 | 0.1         | 0.02 |             |      | 2.76         | 0.14 |            |      |
| <b>Others</b>               |             |       |            |      |             |      |             |      |              |      |            |      |
| 1-ethyl-4-methyl-Benzene    | N.D.        | N.D.  | N.D.       | N.D. | 0.71±0.09a  | 0.14 | 0.59±0.15a  | 0.14 | N.D.         | N.D. | N.D.       | N.D. |
| 3-Methylthiopropanol        | N.D.        | N.D.  | N.D.       | N.D. | 0.37±0.02a  | 0.07 | 0.33±0.03a  | 0.08 | N.D.         | N.D. | N.D.       | N.D. |
| Isopropylbenzene            | 0.57±0.07a  | 0.26  | N.D.       | N.D. | N.D.        | N.D. | N.D.        | N.D. | N.D.         | N.D. | N.D.       | N.D. |
| 1-Ethyl-2,3-dimethylbenzene | 0.44±0.02a  | 0.20  | N.D.       | N.D. | N.D.        | N.D. | N.D.        | N.D. | N.D.         | N.D. | N.D.       | N.D. |
| 1,2,4-Trimethylbenzene      | 3.58±0.44b  | 1.65  | 3.56±0.21b | 0.14 | 7.72±0.32c  | 1.54 | 6.66±0.99c  | 1.62 | 0.99±0.13a   | 0.05 | 2.63±0.54b | 0.26 |
| 1,2,4,5-Tetramethylbenzene  | N.D.        | N.D.  | N.D.       | N.D. | 0.32±0.02b  | 0.06 | 0.53±0.09c  | 0.13 | 0.11±0.06a   | 0.01 | 0.11±0.01a | 0.01 |
| 1,1,6-Trimethyltetralin     | 0.74±0.06a  | 0.34  | N.D.       | N.D. | N.D.        | N.D. | N.D.        | N.D. | N.D.         | N.D. | N.D.       | N.D. |
| Dehydro-ar-ionene           | N.D.        | N.D.  | 0.27±0.05a | 0.01 | 0.23±0.08a  | 0.05 | N.D.        | N.D. | N.D.         | N.D. | 0.26±0.18a | 0.03 |
| 4-Allylphenol               | N.D.        | N.D.  | N.D.       | N.D. | 4.45±0.6a   | 0.89 | N.D.        | N.D. | N.D.         | N.D. | N.D.       | N.D. |
| Phenol                      | 0.11±0.03bc | 0.05  | N.D.       | N.D. | 0.13±0c     | 0.03 | 0.14±0.02c  | 0.03 | 0.08±0ab     | 0.00 | 0.06±0.01a | 0.01 |
| Cyclododecane               | N.D.        | N.D.  | 0.54±0.1a  | 0.02 | N.D.        | N.D. | N.D.        | N.D. | 2.14±0.24b   | 0.11 | N.D.       | N.D. |
| Thymol                      | 0.66±0.07c  | 0.31  | N.D.       | N.D. | 0.49±0.28bc | 0.10 | 0.21±0.09ab | 0.05 | 0.38±0.11abc | 0.02 | 0.1±0.03a  | 0.01 |

|                                     |               |       |                |      |               |      |               |      |                |      |                |      |
|-------------------------------------|---------------|-------|----------------|------|---------------|------|---------------|------|----------------|------|----------------|------|
| 4-Hydroxy-3-methoxystyrene          | N.D.          | N.D.  | 0.24±0.02a     | 0.01 | N.D.          | N.D. | N.D.          | N.D. | N.D.           | N.D. | 0.48±0.02b     | 0.05 |
| 4-Isopropyl-1,6-dimethylnaphthalene | N.D.          | N.D.  | 0.2±0.01b      | 0.01 | N.D.          | N.D. | N.D.          | N.D. | N.D.           | N.D. | 0.1±0.02a      | 0.01 |
| 2,4-Di-tert-butylphenol             | 26.2±1.86b    | 12.09 | 12.93±0.33a    | 0.50 | 13.1±2.55a    | 2.61 | 14.59±2.35a   | 3.57 | 31.49±1.55b    | 1.55 | 17.48±8.27a    | 1.71 |
| In total                            | 32.3          | 14.9  | 17.73          | 0.69 | 27.52         | 5.48 | 23.04         | 5.64 | 35.21          | 1.74 | 21.21          | 2.07 |
| <b>In total</b>                     | <b>216.72</b> |       | <b>2566.70</b> |      | <b>501.98</b> |      | <b>408.78</b> |      | <b>2030.17</b> |      | <b>1021.70</b> |      |

Note: Different letters in the same row indicate that the content levels of the measured substances are significantly different,  $p < 0.05$ . N.D. denotes "not determined."
